# Supplementary material for: Repeated Bilateral Transcranial Direct Current Stimulation over Auditory Cortex for Tinnitus Treatment: A Double-Blinded Randomized Controlled Clinical Trial
Source: MDPI journal article supplement (doi:10.3390/brainsci14040373), 2024-04-12
Supplement: s1 [file s1]

**Supplementary Table S1.** Participants' Characteristics of tDCS intervention.

| Patient No. | Age (Years) | Sex | Hearing Loss Right/Left |
|-------------|-------------|-----|-------------------------|
| 1           | 55          | F   | M/P                     |
| 2           | 43          | F   | N/L                     |
| 3           | 47          | F   | P/L                     |
| 4           | 63          | F   | M/L                     |
| 5           | 48          | F   | N/N                     |
| 6           | 42          | F   | N/N                     |
| 7           | 38          | F   | N/N                     |
| 8           | 54          | F   | N/L                     |
| 9           | 55          | F   | M/L                     |
| 10          | 33          | F   | N/N                     |
| 11          | 48          | F   | L/L                     |
| 12          | 43          | F   | M/M                     |
| 13          | 42          | F   | L/N                     |
| 14          | 47          | F   | M/L                     |
| 15          | 57          | M   | L/M                     |
| 16          | 47          | M   | L/N                     |
| 17          | 48          | M   | L/N                     |
| 18          | 38          | M   | N/N                     |
| 19          | 48          | M   | N/N                     |
| 20          | 52          | M   | N/N                     |
| 21          | 62          | M   | N/L                     |
| 22          | 45          | M   | L/L                     |
| 23          | 50          | M   | P/L                     |
| 24          | 36          | M   | P/M                     |
| 25          | 47          | M   | M/N                     |

Class of hearing loss: N, normal hearing threshold (<20 dB); L, mild hearing loss (20–40 dB); M, moderate hearing loss (41–70 dB); S, severe hearing loss (70–90 dB); P, profound hearing loss (>90 dB).

**Supplementary Table S2.** Participants' characteristics of sham stimulation.

| Patient No. | Age (Years) | Sex | Hearing Loss Right/Left |
|-------------|-------------|-----|-------------------------|
| 1           | 55          | F   | M/P                     |
| 2           | 43          | F   | N/L                     |
| 3           | 47          | F   | P/L                     |
| 4           | 63          | F   | L/M                     |
| 5           | 48          | F   | N/L                     |
| 6           | 42          | F   | N/N                     |
| 7           | 38          | F   | N/N                     |
| 8           | 54          | F   | L/N                     |
| 9           | 55          | M   | M/L                     |
| 10          | 33          | M   | N/N                     |
| 11          | 48          | M   | L/L                     |
| 12          | 43          | M   | M/M                     |
| 13          | 42          | M   | L/N                     |
| 14          | 47          | M   | M/L                     |
| 15          | 57          | M   | L/M                     |

Class of hearing loss: N, normal hearing threshold (<20 dB); L, mild hearing loss (20–40 dB); M, moderate hearing loss (41–70 dB); S, severe hearing loss (70–90 dB); P, profound hearing loss (>90 dB).
